# Supplementary material
Source: MDPI journal article supplement (https://www.mdpi.com/2313-0105/9/11/554)
Supplement: s1 [file s1]

## Supporting information

# A Facile Two-Step Thermal Process for Producing a Dense, Phase-Pure, Cubic Ta-Doped Lithium Lanthanum Zirconium Oxide Electrolyte for Upscaling

Diwakar Karuppiyah <sup>1,2,\*</sup>, Dmitrii Komissarenko <sup>1,3</sup>, Nur Sena Yüzbaşı <sup>1</sup>, Yang Liu <sup>1</sup>,  
Pradeep Vallachira Warriam Sasikumar <sup>1,4</sup>, Amir Hadian <sup>1,5</sup>, Thomas Graule <sup>1</sup>, Frank Clemens <sup>1</sup>  
and Gurdial Blugan <sup>1,\*</sup>

<sup>1</sup> Laboratory for High Performance Ceramics, Empa, Swiss Federal Laboratories for Materials Science and Technology, CH-8600 Duebendorf, Switzerland;  
dmitrii.komissarenko@fhnw.ch (D.K.); sena.yuezbaşı@empa.ch (N.S.Y.);  
pradeep.warriam@advano.io (P.V.W.S.); amir.hadian@fhnw.ch (A.H.);  
thomas.graule@empa.ch (T.G.); frank.clemens@empa.ch (F.C.)

<sup>2</sup> Department of Mechanical Engineering Applied Mechanics, University of Pennsylvania, Philadelphia, PA 19104, USA

<sup>3</sup> Institute for Biomass and Resource Efficiency, University of Applied Sciences and Arts Northwestern Switzerland (FHNW), 5210 Windisch, Switzerland

<sup>4</sup> ADVANO, Lakeshore Drive, New Orleans, LA 70112, USA

<sup>5</sup> Institute of Product and Production Engineering, University of Applied Sciences and Arts Northwestern Switzerland (FHNW), 5210 Windisch, Switzerland

\* Correspondence: diwakark@seas.upenn.edu (D.K.); gurdial.blugan@empa.ch (G.B.)

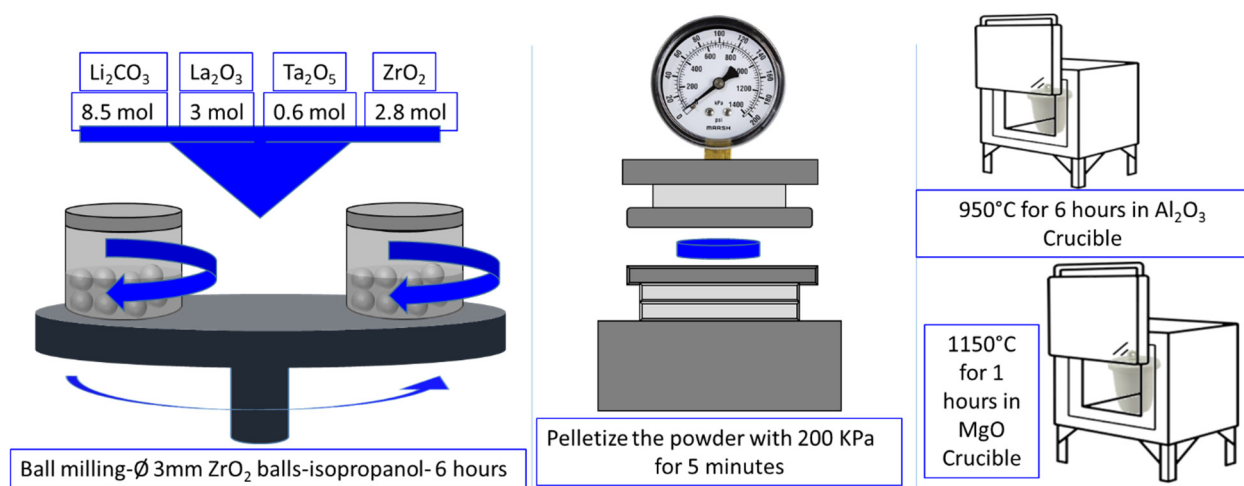

**Figure S1** Schematic representation of the experimental process of Ta:LLZO.

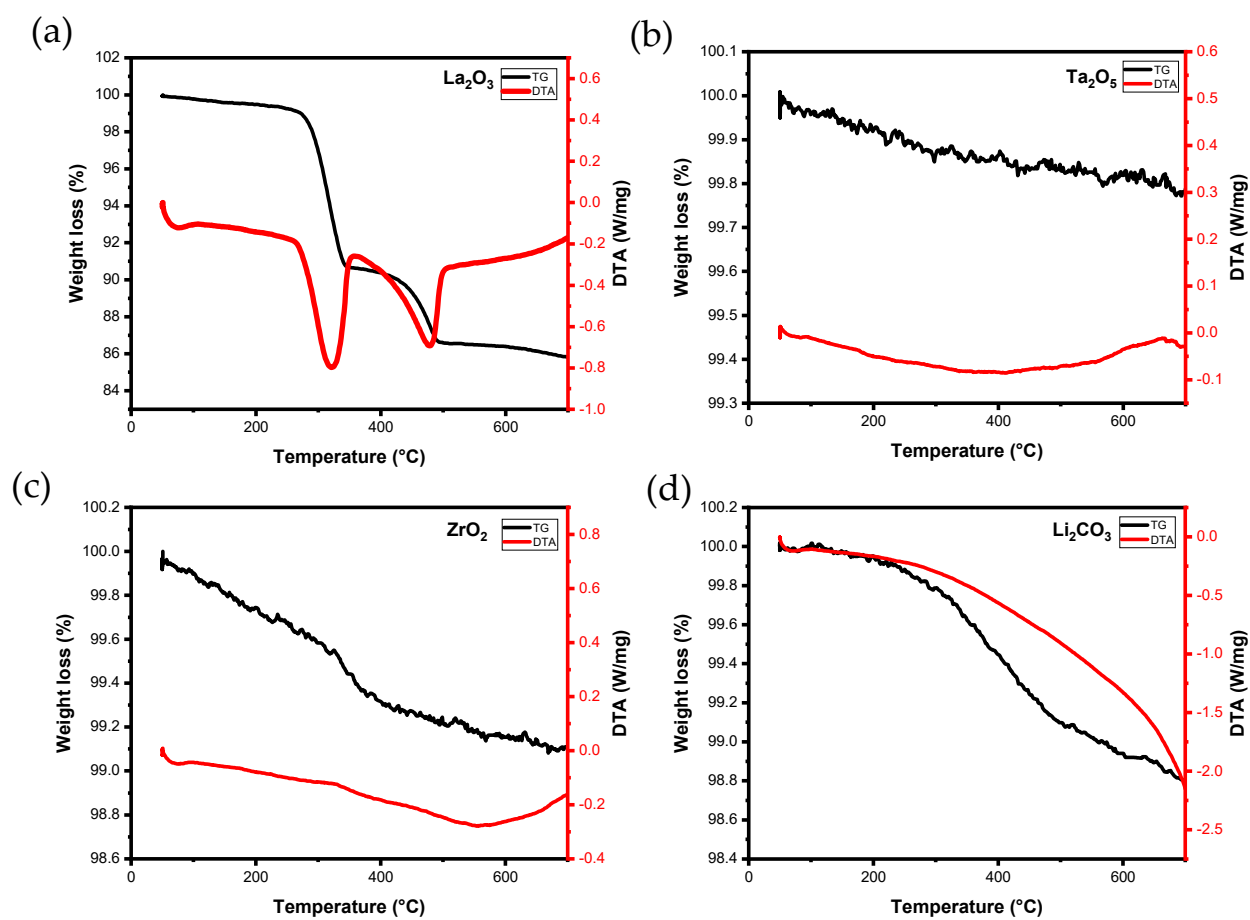

**Figure S2(a-d)** TG and DTA of wet milled  $\text{La}_2\text{O}_3$ ,  $\text{Ta}_2\text{O}_5$ ,  $\text{ZrO}_2$  and  $\text{Li}_2\text{CO}_3$  powder.
